# Supplementary material
Source: Springer Nature journal article supplement (https://www.springermedizin.de/resource/supplementary/13018_2014_420_MOESM6_ESM.pdf/9636996)
Supplement: MOESM6 [file 9636996]

Table 3

|                    | Number of patients (n=32 ) |
|--------------------|----------------------------|
| Less than 1 month  | 11 (32%)                   |
| 1 – 3 months       | 18 (56%)                   |
| 3 – 6 months       | 1 (3%)                     |
| More than 6 months | 1 (3%)                     |
| Not responded      | 1 (3%)                     |
